# Supplementary material for: Amplification and propagation of interleukin-1β signaling by murine brain endothelial and glial cells
Source: PubMed Central journal article supplement (PMC5494131; doi:10.1186/s12974-017-0908-4), 2017-07-01

**A**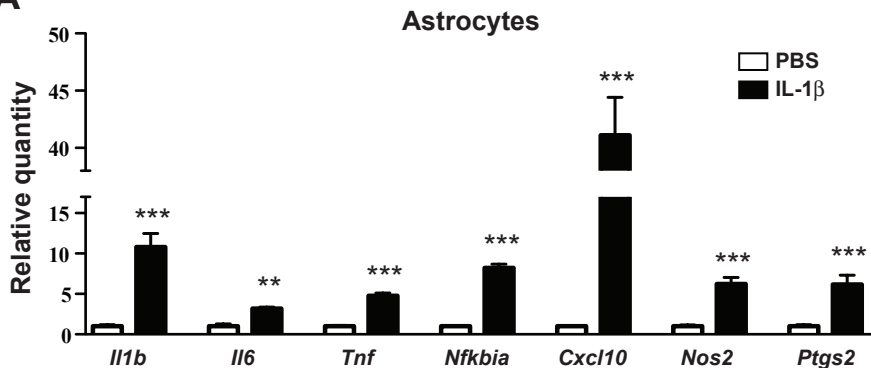**B**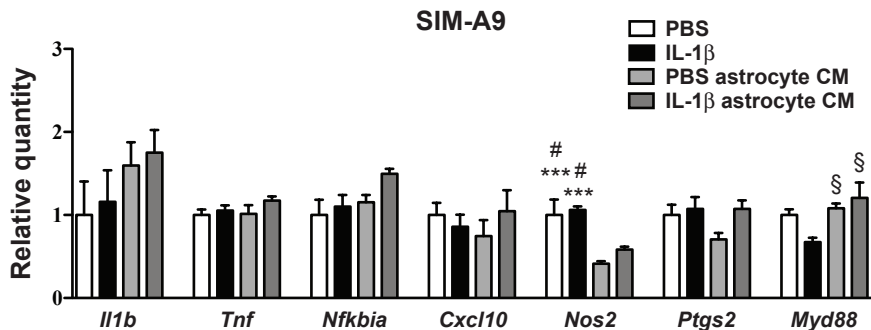

Supplement: 12974_2017_908_MOESM4_ESM.pdf [file 12974_2017_908_MOESM4_ESM.pdf]
